# Supplementary material
Source: MDPI journal article supplement (https://www.mdpi.com/2311-5637/9/8/773)
Supplement: s1 [file s1]

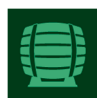**Supplementary Table S1.** Meteorological data (temperature and rainfall) during growth period May–September 2017.

| Region            | Area (regional unit) | Mean monthly temperature (°C) |      |      |      |      |       | Rainfall (mm) |      |      |       | Sum of rainfall for months May–September |
|-------------------|----------------------|-------------------------------|------|------|------|------|-------|---------------|------|------|-------|------------------------------------------|
|                   |                      | T5                            | T6   | T7   | T8   | T9   | R5    | R6            | R7   | R8   | R9    | R5-9                                     |
| Thrace            | Rodopi               | 17.5                          | 24.4 | 26   | 26.4 | 21.4 | 40.6  | 16.0          | 0.0  | 0.0  | 4.6   | 61.2                                     |
| Eastern Macedonia | Kavala               | 17.9                          | 24.5 | 26.4 | 26.8 | 21.8 | 35.8  | 7.8           | 1.8  | 1.6  | 14.8  | 61.8                                     |
| Central Macedonia | Serres               | 18.5                          | 24.9 | 26.7 | 26.1 | 20.9 | 78    | 25.2          | 10.6 | 36.4 | 206.8 | 357                                      |
| Central Macedonia | Kilkis               | 19.6                          | 26.1 | 27.7 | 26.6 | 21.3 | 112.8 | 39.0          | 10.2 | 16.8 | 113.0 | 291.8                                    |
| Central Macedonia | Thessaloniki         | 19.4                          | 25.8 | 27.2 | 26.5 | 21.6 | 79.4  | 7.4           | 24.8 | 42.2 | 91.4  | 245.2                                    |
| Central Macedonia | Chalkidiki           | 18.5                          | 24.6 | 26.3 | 25.8 | 21.7 | 42.8  | 13.6          | 2.0  | 27.4 | 374.4 | 460.2                                    |
| Central Macedonia | Athos                | 18.9                          | 25.2 | 27.2 | 27.3 | 22.8 | 141.0 | 12.0          | 3.8  | 0.6  | 75.2  | 232.6                                    |
| Central Macedonia | Imathia              | 17.6                          | 24.4 | 26.2 | 25.2 | 20.2 | 91.0  | 6.0           | 8.4  | 27.4 | 114.4 | 247.2                                    |
| Central Macedonia | Pella                | 16.9                          | 24.5 | 26.6 | 25.2 | 19.5 | 85.2  | 23.2          | 23.4 | 44   | 10.2  | 186                                      |
| Western Macedonia | Florina              | 15.3                          | 21.5 | 23.6 | 22.2 | 17.5 | 118.0 | 80.4          | 41.6 | 30.2 | 149.0 | 419.2                                    |
| Thessaly          | Larissa              | 20                            | 26.9 | 28.6 | 27.6 | 22.2 | 33    | 6.2           | 0.4  | 0.2  | 98.2  | 138                                      |
| North Aegean      | Lemnos               | 18.5                          | 24.8 | 27.1 | 27   | 22.7 | 43.4  | 0.0           | 0.0  | 0.0  | 0.0   | 43.4                                     |

**Supplementary Table S2.** Variation (minimum–maximum value observed) of Yeast Assimilable Nitrogen, Free Amino Nitrogen, ammoniacal Nitrogen in grape musts categorized per grape origin (mg N L<sup>-1</sup> must)<sup>1</sup>

| Regional unit | No of samples | YAN (N L <sup>-1</sup> )         | FAN (N L <sup>-1</sup> )         | NH <sub>4</sub> -N Ammonia (N L <sup>-1</sup> ) | Baume (Be)                   | pH                       | Total Acidity (g L <sup>-1</sup> Tartaric Acid) |
|---------------|---------------|----------------------------------|----------------------------------|-------------------------------------------------|------------------------------|--------------------------|-------------------------------------------------|
| Rodopi        | 29            | 41.73-277.50<br>(157.25/152.46)  | 30.77-222.90<br>(106.97/105.80)  | 4.12-107.70<br>(50.28/47.10)                    | 9.50-13.50<br>(11.88/12.00)  | 3.21-3.61<br>(3.38/3.39) | 5,25-8,66<br>(6.73/6.53)                        |
| Kavala        | 10            | 114.07-190.40<br>(148.47/145.09) | 63.46-135.70<br>(91.59/84.13)    | 45.21-64.78<br>(56.88/57.90)                    | 10.86-12.50<br>(11.71/11.75) | 3.19-3.65<br>(3.42/3.37) | 5,36-8,81<br>(6.48/6.10)                        |
| Serres        | 20            | 84.00-265.55<br>(189.42/204.62)  | 51.53-193.00<br>(138.60/158.10)  | 18.04-81.87<br>(50.82/46.65)                    | 9.11-12.70<br>(10.94/10.90)  | 3.34-3.79<br>(3.56/3.57) | 3,83-6,38<br>(5.02/5.26)                        |
| Kilkis        | 13            | 63.12-231.58<br>(133.78/128.97)  | 35.10-170.60<br>(92.02/89.14)    | 17.08-60.98<br>(41.76/44.98)                    | 11.00-12.70<br>(11.80/11.80) | 3.28-3.47<br>(3.37/3.39) | 5,14-7,61<br>(6.47/6.71)                        |
| Thessaloniki  | 46            | 114.38-271.86<br>(180.04/176.80) | 60.13-212.10<br>(115.21/112.55)  | 0.70-142.86<br>(64.83/61.44)                    | 9.80-14.00<br>(12.00/12.05)  | 3.27-3.68<br>(3.48/3.47) | 3,51-8,78<br>(6.44/6.56)                        |
| Chalkidiki    | 78            | 70.00-249.49<br>(164.83/166.32)  | 31.53-176.10<br>(103.25/99.47)   | 4.66-98.57<br>(61.58/66.13)                     | 9.10-16.10<br>(11.82/11.85)  | 3.04-3.65<br>(3.40/3.41) | 4,46-9,94<br>(6.47/6.32)                        |
| Imathia       | 2             | 148.40-219.80<br>(184.10/184.10) | 82.35-107.40<br>(94.88/94.88)    | 66.05-112.40<br>(89.23/89.23)                   | 13.10-13.70<br>(13.40/13.40) | 3.51-3.55<br>(3.53/3.53) | 6,04-6,64<br>(6.34/6.34)                        |
| Pella         | 5             | 193.42-277.04<br>(236.14/220.91) | 161.30-205.80<br>(192.18/194.80) | 10.61-79.51<br>(43.96/32.12)                    | 10.50-12.30<br>(11.06/10.80) | 3.26-3.40<br>(3.35/3.35) | 7,16-8,44<br>(7.66/7.69)                        |
| Florina       | 11            | 99.31-204.65<br>(164.90/173.94)  | 52.68-141.00<br>(100.29/101.00)  | 36.29-87.49<br>(64.61/59.80)                    | 10.30-12.30<br>(11.30/11.10) | 2.87-3.35<br>(3.05/3.02) | 5,25-10,59<br>(9.48/9.94)                       |
| Larissa       | 30            | 89.60-275.41<br>(153.27/149.10)  | 46.33-191.90<br>(110.73/108.95)  | 3.40-97.64<br>(42.54/38.75)                     | 9.80-13.50<br>(11.75/11.81)  | 3.32-3.60<br>(3.47/3.49) | 3,60-7,20<br>(5.80/5.85)                        |
| Lemnos        | 12            | 39.79-174.94<br>(104.01/86.86)   | 30.58-145.60<br>(82.40/66.64)    | 9.21-31.67<br>(21.62/20.92)                     | 10.90-13.20<br>(12.55/12.65) | 3.33-3.58<br>(3.49/3.50) | 4,87-7,39<br>(5.93/5.97)                        |
| Athos         | 18            | 73.06-154.00<br>(124.93/128.70)  | 62.04-137.80<br>(90.20/84.97)    | 2.30-77.94<br>(34.73/22.16)                     | 11.20-14.10<br>(12.73/12.67) | 3.17-3.65<br>(3.44/3.45) | 4,50-8,40<br>(6.15/6.02)                        |

<sup>1</sup> The mean/median values of the measurements are shown in parentheses
